# Supplementary material for: Autopsies Revealed Pathological Features of COVID-19 in Unvaccinated vs. Vaccinated Patients
Source: MDPI journal article supplement (doi:10.3390/biomedicines11020551), 2023-02-14
Supplement: s1 [file s1]

**“Autopsies revealed pathological features of COVID-19 in unvaccinated vs vaccinated patients”**

**Table S1**

**Post-mortem PCR detection of SARS-CoV-2 in different organs.**

|                              | Sample              |                |               |                 |                |            |       |       |        |
|------------------------------|---------------------|----------------|---------------|-----------------|----------------|------------|-------|-------|--------|
|                              | Nasopharyngeal swab | Right Bronchus | Left Bronchus | Lung Right lobe | Lung Left lobe | Myocardium | Brain | Liver | Kidney |
| <b>Vaccinated Patients</b>   |                     |                |               |                 |                |            |       |       |        |
| n.1                          | gray                | gray           | gray          | red             | red            | red        | green | gray  | gray   |
| n. 2                         | red                 | red            | red           | green           | red            | red        | gray  | gray  | red    |
| n. 3                         | gray                | red            | red           | red             | red            | gray       | gray  | gray  | gray   |
| n. 4                         | red                 | red            | red           | red             | red            | green      | red   | gray  | red    |
| n. 5                         | red                 | red            | red           | red             | red            | green      | green | green | green  |
|                              |                     |                |               |                 |                |            |       |       |        |
| <b>Unvaccinated Patients</b> |                     |                |               |                 |                |            |       |       |        |
| n.1                          | red                 | red            | red           | red             | red            | red        | green | gray  | gray   |
| n. 2                         | red                 | red            | red           | red             | red            | red        | green | gray  | gray   |
| n. 3                         | red                 | red            | red           | red             | red            | red        | red   | red   | gray   |
| n. 4                         | red                 | red            | green         | red             | red            | green      | gray  | green | green  |
| n. 5                         | red                 | red            | red           | red             | red            | red        | gray  | green | red    |

Red = positive,; green = negative,; gray = test not performed

“Autopsies revealed pathological features of COVID-19 in unvaccinated vs vaccinated patients”

Fig S1

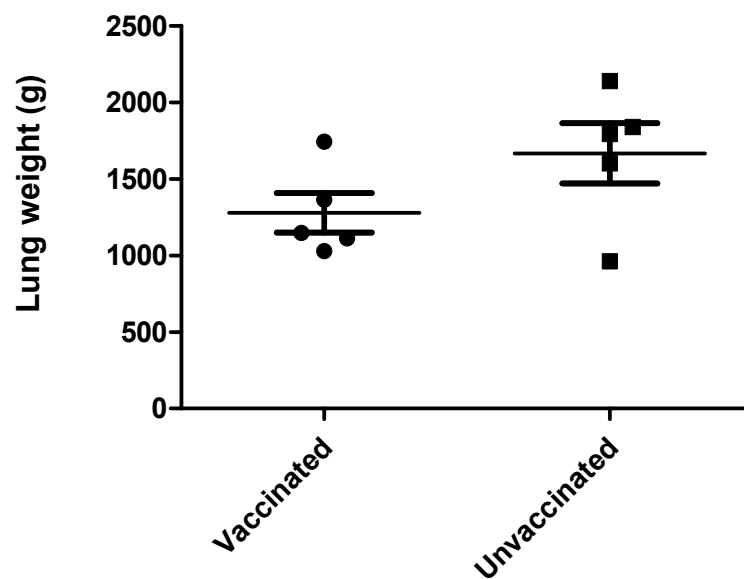

**Figure S1** Distribution of total lung weight in vaccinated and unvaccinated patients. Horizontal bars indicate the median values

“Autopsies revealed pathological features of COVID-19 in unvaccinated vs vaccinated patients”

Fig S2

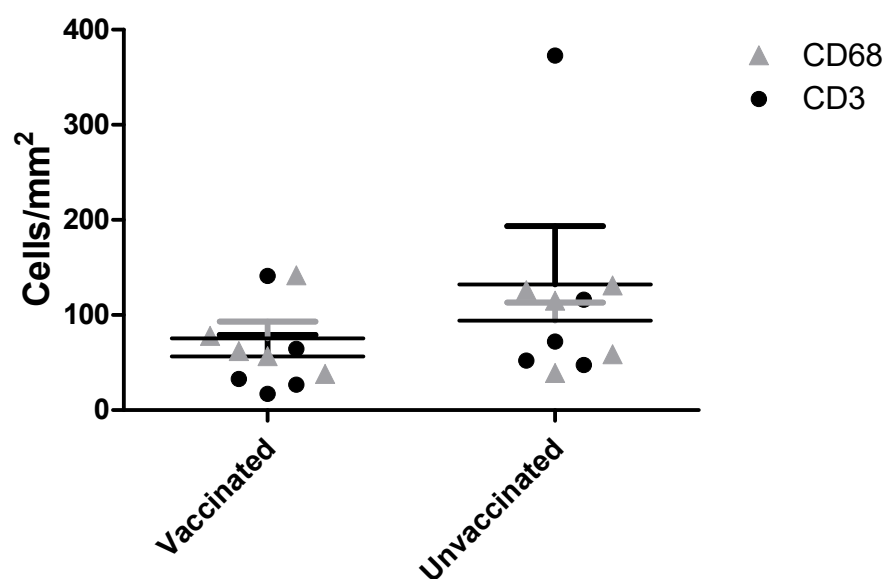

**Figure S2.** Inflammatory cells in lung tissue from vaccinated and unvaccinated patients. Each point represents the mean number of CD68+ and CD3+ cells per mm<sup>2</sup>, for each patient.

“Autopsies revealed pathological features of COVID-19 in unvaccinated vs vaccinated patients”

Fig S3

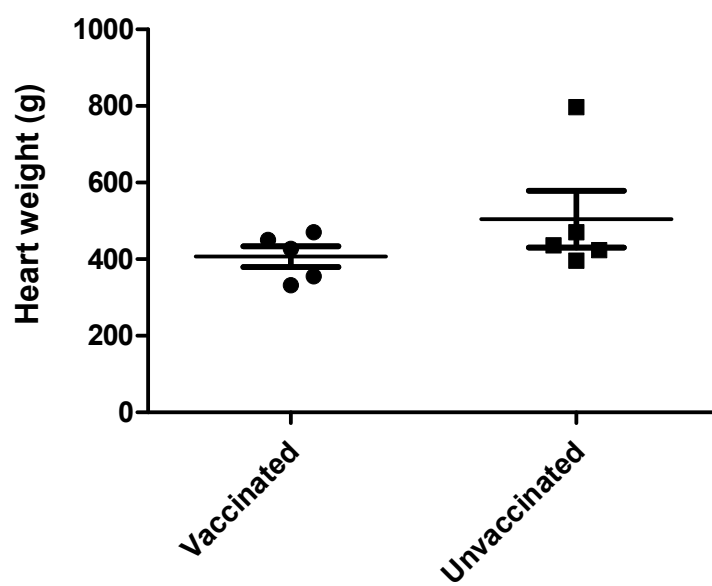

**Figure S3** Distribution of heart weight in vaccinated and unvaccinated patients. Horizontal bars indicate the median values

“Autopsies revealed pathological features of COVID-19 in unvaccinated vs vaccinated patients”

Fig S4

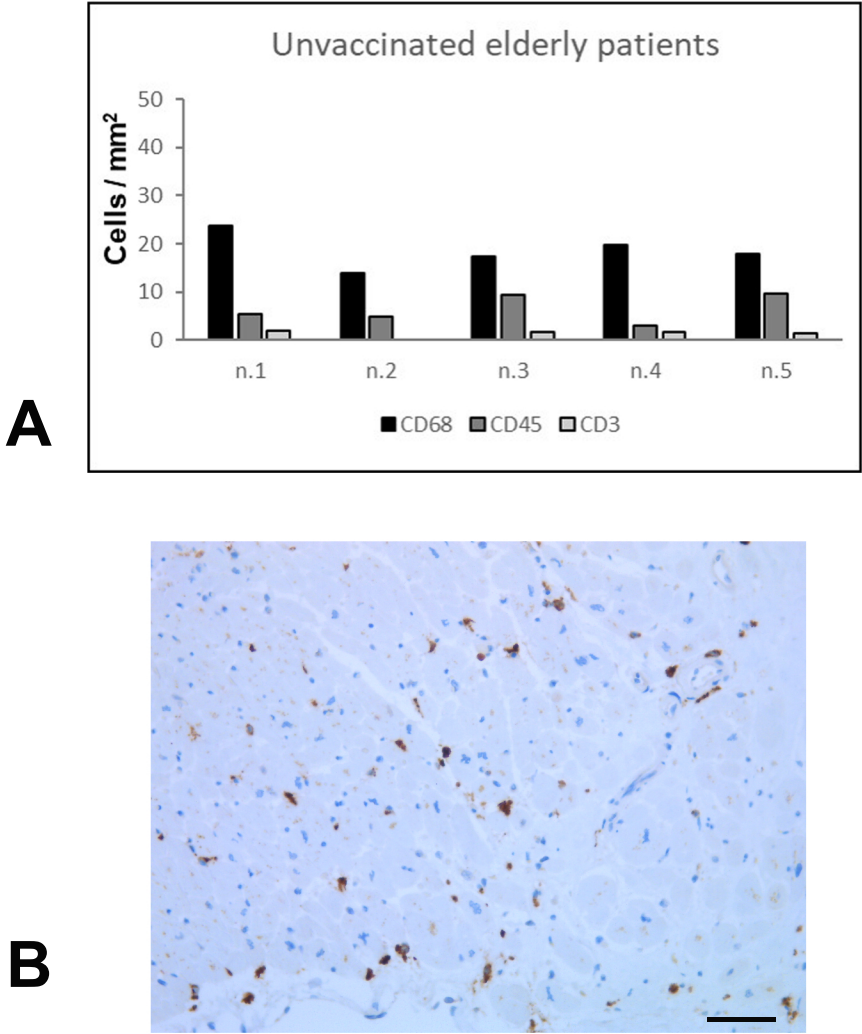

**Figure S4** Inflammatory cells immune-characterization in myocardial tissue from unvaccinated elderly COVID-19 deceased patients. (A) Quantification of the number of extravascular CD68+ macrophages, CD45+ leukocytes, and CD3+ T lymphocytes. For each case (n.1-n.5) the mean number of cells per mm<sup>2</sup> is reported. (B) Representative photomicrograph of anti-CD68 immunohistochemistry. The presence of numerous labelled macrophages is visible. Scale bars: B = 28  $\mu$ m.

**“Autopsies revealed pathological features of COVID-19 in unvaccinated vs vaccinated patients”**

**Table S2. Brain histopathological findings.**

| N°                           | Pre-existing medical conditions affecting brain             | RT-PCR results on brain tissue | Neuropathological findings                                                                                                                                                                                                                                                                                                                                                                                                                         |
|------------------------------|-------------------------------------------------------------|--------------------------------|----------------------------------------------------------------------------------------------------------------------------------------------------------------------------------------------------------------------------------------------------------------------------------------------------------------------------------------------------------------------------------------------------------------------------------------------------|
| <b>UNVACCINATED PATIENTS</b> |                                                             |                                |                                                                                                                                                                                                                                                                                                                                                                                                                                                    |
| 1                            | None                                                        | Negative                       | Axonal vacuolization, degeneration of neurons, dilatation and congestion of vessels with perivascular inflammatory infiltrate mainly consisting in T lymphocytes (CD3+), cytotoxic (CD8+), focal perivascular hemorrhagic extravasations                                                                                                                                                                                                           |
| 2                            | None                                                        | Negative                       | Widespread presence of corpora amylacea in the subependymal site and mostly involving the brainstem associated to chronic inflammation substained by CD3 T lymphocytes, CD8 positive , mostly perivascular. Focal perivascular hemorrhagic extravasations at the cortical and thalamic level where it is also present rarefaction of the parenchyma. Cerebral artery dilatation with fibrointimal hyperplasia, wall calcifications and hemorrhages |
| 3                            | Hepatic encephalopatý                                       | Positive                       | Areas of petechial hemorrhages with vascular endothelial proliferation, spongiosis and proliferation of astrocytes characterized by nuclear pallor, swelling, and chromatin margination; microglial activation is associated with the formation of microglial nodules mixed with debris necrotic and inflammatory cells (neutrophils and macrophages)                                                                                              |
| <b>VACCINATED PATIENTS</b>   |                                                             |                                |                                                                                                                                                                                                                                                                                                                                                                                                                                                    |
| 1                            | Parkinson’s disease treatment with “deep brain stimulation” | Negative                       | Brain Atrophy                                                                                                                                                                                                                                                                                                                                                                                                                                      |
| 4                            | Hepatic encephalopatý                                       | Positive                       | Microglial activation, swollen astrocytes with pale nuclei, eosinophilic nucleoli, scanty cytoplasm, perivascular blood extravasations                                                                                                                                                                                                                                                                                                             |
| 5                            | Epilepsy, cerebral vasculopathy                             | Negative                       | Perivascular microhemorrhages, microglial nodules and astroglial activation due to ischemic hypoxic damage with small vessels damage and hyaline arteriolosclerosis                                                                                                                                                                                                                                                                                |
